# Supplementary material for: Simultaneous evaluation of sensitivity and side effects of anti-cancer drugs using patient- derived cancer organoids and a microfluidic device
Source: Research Square preprint supplement (doi:10.21203/rs.3.rs-5318779/v1), 2024-10-28
Supplement: Supplementary file 1 [file ce36462d8a799a15ea4933c6.xlsx]

## Sheet: Table 1
Table 1． Primers for real-time quantitative PCR analysis
	Gene	Primer	Sequence
	f GAPDH	Forward	5′-CTCATGACCACAGTCCATGC-3′
		Reverse	5′-TGAGCTTCCCATTCAGCTCT-3′
	f Bax	Forward	5′-TTTGCTTCAGGGTTTCATCC-3′
		Reverse	5′-GTCCAGTTCATCTCCGATGC-3′
	f p53	Forward	5′-AACTGACACCCTCACCCTTG-3′
		Reverse	5′-CTCCCTCACGGTTCCTCATA-3′
	f Bcl2	Forward	5′-TTCAGCCGTGTAACTTGCAG-3′
		Reverse	5′-GGAGTGGGAGGAGGAGGTAA-3′
	f Caspase-9	Forward	5′-CTAGTTTGCCCACACCCAGT-3′
		Reverse	5′-ACTGCTCGAAAACACCATCC-3′
	f Caspase-8	Forward	5′-AGGATGTGCCCAAACTTCAG-3′
		Reverse	5′-TCCATGGGAGAGGATACAGC-3′
	f Cyclin D1	Forward	5′-CACACGGACTACAGGGGAGT-3′
		Reverse	5′-TCGCAGCATAAGAGTTGGTG-3′
	f Cyclin E1	Forward	5′-TGCTGAAGATGCACACAACA-3′
		Reverse	5′-CTGGTGTGGTCACACTGTCC-3′
	m GAPDH	Forward	5′-GAGAGGCCCTATCCCAACTC-3′
		Reverse	5′-GTGGGTGCAGCGAACTTTAT-3′
	m Bax	Forward	5′-CACCCCTTTCCTCCTCTCTC-3′
		Reverse	5′-GGAGACACTCGCTCAGCTTC-3′
	m p53	Forward	5′-TGGAAGACTCCAGTGGGAAC-3′
		Reverse	5′-TCTTCTGTACGGCGGTCTCT-3′
	m Caspase-9	Forward	5′-TGCCCTTGCCTCTGAGTAGT-3′
		Reverse	5′-AACAAAGAAACGCCCACAAC-3′
	m Caspase-8	Forward	5′-GGCCTCCATCTATGACCTGA-3′
		Reverse	5′-TGTGGTTCTGTTGCTCGAAG-3′
	m RIPK3	Forward	5′-GGGACCTCAAGCCCTCTAAC-3′
		Reverse	5′-GATCCTGATCCTGACCCTGA-3′
	m Mlkl	Forward	5′-GTTTGTGAGTGTGGGCAATG-3′
		Reverse	5′-GCATTGCTTCAGGGTTTTGT-3′
	m Ulk1	Forward	5′-TGCTGGCAGGTAGACATCAG-3′
		Reverse	5′-GAAAAGCTTGCTTTGGCTTG-3′
	m Atg12	Forward	5′-TAGAGCCCTACCCAGTGTGG-3′
		Reverse	5′-TGAATGCTGGAGAGATGCAG-3′
	m Pik3c3	Forward	5′-TCCTTGATGGTTGATGCAAA-3′
		Reverse	5′-AGTGCACAGCCTCCTCATCT-3′
